# Supplementary material for: An Alternative Nutrient Rich Food Index (NRF-ai) Incorporating Prevalence of Inadequate and Excessive Nutrient Intake
Source: MDPI journal article supplement (doi:10.3390/foods10123156), 2021-12-20
Supplement: s1 [file s1]

## Supplementary Materials

An alternative Nutrient Rich Food index (NRF-ai) incorporating prevalence of inadequate and excessive nutrient intake

Bradley Ridoutt

**Supplementary Table S1.** Daily Estimated Average Requirement (EAR) for nutrients according to age and gender subgroups.

| Nutrient                | Unit | EAR     |       |       |       |       |       |       |       |
|-------------------------|------|---------|-------|-------|-------|-------|-------|-------|-------|
|                         |      | Females |       |       |       | Males |       |       |       |
|                         |      | 19-30   | 31-50 | 50-70 | 70+   | 19-30 | 31-50 | 50-70 | 70+   |
| Protein                 | g    | 37      | 37    | 37    | 46    | 52    | 52    | 52    | 65    |
| Vitamin B1              | mg   | 0.9     | 0.9   | 0.9   | 0.9   | 1     | 1     | 1     | 1     |
| Vitamin B2              | mg   | 0.9     | 0.9   | 0.9   | 1.1   | 1.1   | 1.1   | 1.1   | 1.3   |
| Vitamin B3 <sup>1</sup> | mg   | 11      | 11    | 11    | 11    | 12    | 12    | 12    | 12    |
| Vitamin B6              | mg   | 1.1     | 1.1   | 1.3   | 1.3   | 1.1   | 1.1   | 1.4   | 1.4   |
| Vitamin B12             | µg   | 2       | 2     | 2     | 2     | 2     | 2     | 2     | 2     |
| Folate <sup>2</sup>     | µg   | 320     | 320   | 320   | 320   | 320   | 320   | 320   | 320   |
| Vitamin A <sup>3</sup>  | µg   | 500     | 500   | 500   | 500   | 625   | 625   | 625   | 625   |
| Vitamin C               | mg   | 30      | 30    | 30    | 30    | 30    | 30    | 30    | 30    |
| Calcium                 | mg   | 840     | 840   | 1,100 | 1,100 | 840   | 840   | 840   | 1,100 |
| Phosphorus              | mg   | 580     | 580   | 580   | 580   | 580   | 580   | 580   | 580   |
| Zinc                    | mg   | 6.5     | 6.5   | 6.5   | 6.5   | 12    | 12    | 12    | 12    |
| Iron                    | mg   | 8       | 8     | 5     | 5     | 6     | 6     | 6     | 6     |
| Magnesium               | mg   | 255     | 265   | 265   | 265   | 330   | 350   | 350   | 350   |
| Iodine                  | µg   | 100     | 100   | 100   | 100   | 100   | 100   | 100   | 100   |
| Selenium                | µg   | 50      | 50    | 50    | 50    | 60    | 60    | 60    | 60    |
| Molybdenum              | µg   | 34      | 34    | 34    | 34    | 34    | 34    | 34    | 34    |

<sup>1</sup> Niacin equivalents; <sup>2</sup> Dietary folate equivalents; <sup>3</sup> Retinol equivalents. All nutrients for which an EAR is quantified in Australia by the National Health and Medical Research Council (NHMRC) are included. Data sourced from <https://www.nrv.gov.au/>

**Supplementary Table S2.** Examples of standard serves of food described in the Australian Dietary Guidelines

| <b>Food description</b>                  | <b>Unit</b> | <b>Standard serve</b> |
|------------------------------------------|-------------|-----------------------|
| Vegetables                               | g           | 75                    |
| Fruit (fresh)                            | g           | 150                   |
| Fruit (juice)                            | ml          | 125                   |
| Fruit (dried)                            | g           | 30                    |
| Milk                                     | ml          | 250                   |
| Soy, rice, nut, or cereal beverage       | ml          | 250                   |
| Cheese (firm)                            | g           | 40                    |
| Cheese (soft, such as Ricotta)           | g           | 120                   |
| Ice-cream                                | g           | 75                    |
| Eggs                                     | g           | 120                   |
| Legumes/beans (soaked, cooked)           | g           | 150                   |
| Tofu                                     | g           | 170                   |
| Nuts                                     | g           | 30                    |
| Meat (red, cooked)                       | g           | 65                    |
| Meat (poultry, cooked)                   | g           | 80                    |
| Fish (cooked)                            | g           | 100                   |
| Bread                                    | g           | 40                    |
| Commercial breakfast cereal              | g           | 30                    |
| Beverage (sugar or artificial sweetener) | ml          | 375                   |
| Biscuit (sweet)                          | g           | 35                    |
| Salty cracker or crisps                  | g           | 30                    |
| Chocolate                                | g           | 25                    |

Data sourced from <https://www.eatforhealth.gov.au/guidelines>

**Supplementary Table S3.** Nutrient weighting factors applicable for Australian adults and adult subgroups.

|                | Females | Males | All   | Females | Males | All   | Females | Males | All   | Females | Males | All  | Males | Females | All  |
|----------------|---------|-------|-------|---------|-------|-------|---------|-------|-------|---------|-------|------|-------|---------|------|
|                | 19-30   | 19-30 | 19-30 | 31-50   | 31-50 | 31-50 | 51-70   | 51-70 | 51-70 | 70+     | 70+   | 70+  | 19+   | 19+     | 19+  |
| Calcium        | 0.20    | 0.19  | 0.20  | 0.21    | 0.19  | 0.20  | 0.30    | 0.21  | 0.26  | 0.25    | 0.22  | 0.24 | 0.20  | 0.24    | 0.22 |
| Free sugar     | 0.17    | 0.25  | 0.20  | 0.14    | 0.22  | 0.17  | 0.12    | 0.13  | 0.12  | 0.11    | 0.12  | 0.11 | 0.18  | 0.14    | 0.15 |
| Magnesium      | 0.10    | 0.15  | 0.12  | 0.10    | 0.16  | 0.13  | 0.10    | 0.16  | 0.13  | 0.13    | 0.16  | 0.14 | 0.15  | 0.11    | 0.13 |
| Vitamin B6     | 0.10    | 0.02  | 0.07  | 0.12    | 0.04  | 0.08  | 0.19    | 0.13  | 0.16  | 0.19    | 0.14  | 0.17 | 0.08  | 0.14    | 0.12 |
| Zinc           | 0.04    | 0.16  | 0.09  | 0.03    | 0.17  | 0.09  | 0.03    | 0.17  | 0.10  | 0.03    | 0.16  | 0.09 | 0.17  | 0.03    | 0.09 |
| Vitamin A      | 0.06    | 0.09  | 0.07  | 0.05    | 0.08  | 0.06  | 0.04    | 0.06  | 0.05  | 0.04    | 0.03  | 0.04 | 0.07  | 0.05    | 0.05 |
| Thiamin(B1)    | 0.05    | 0.03  | 0.04  | 0.06    | 0.03  | 0.05  | 0.06    | 0.03  | 0.05  | 0.05    | 0.02  | 0.04 | 0.03  | 0.06    | 0.05 |
| Iron           | 0.10    | 0.01  | 0.07  | 0.12    | 0.01  | 0.07  | 0.02    | 0.01  | 0.01  | 0.02    | 0.01  | 0.01 | 0.01  | 0.07    | 0.04 |
| Protein        | 0.05    | 0.05  | 0.05  | 0.04    | 0.05  | 0.04  | 0.03    | 0.04  | 0.04  | 0.02    | 0.04  | 0.03 | 0.05  | 0.03    | 0.04 |
| Riboflavin(B2) | 0.02    | 0.01  | 0.02  | 0.02    | 0.02  | 0.02  | 0.03    | 0.03  | 0.03  | 0.05    | 0.05  | 0.05 | 0.03  | 0.03    | 0.03 |
| Iodine         | 0.03    | 0.01  | 0.02  | 0.03    | 0.01  | 0.02  | 0.03    | 0.01  | 0.02  | 0.02    | 0.01  | 0.02 | 0.01  | 0.03    | 0.02 |
| Folate         | 0.03    | 0.01  | 0.02  | 0.03    | 0.01  | 0.02  | 0.02    | 0.01  | 0.02  | 0.02    | 0.00  | 0.01 | 0.01  | 0.03    | 0.02 |
| Selenium       | 0.02    | 0.01  | 0.01  | 0.02    | 0.01  | 0.01  | 0.02    | 0.01  | 0.02  | 0.03    | 0.03  | 0.03 | 0.01  | 0.02    | 0.02 |
| Vitamin B12    | 0.02    | 0.00  | 0.01  | 0.02    | 0.00  | 0.01  | 0.02    | 0.00  | 0.01  | 0.02    | 0.00  | 0.01 | 0.00  | 0.02    | 0.01 |
| Vitamin C      | 0.01    | 0.01  | 0.01  | 0.01    | 0.01  | 0.01  | 0.01    | 0.00  | 0.01  | 0.01    | 0.00  | 0.01 | 0.01  | 0.01    | 0.01 |
| Phosphorus     | 0.00    | 0.00  | 0.00  | 0.00    | 0.00  | 0.00  | 0.00    | 0.00  | 0.00  | 0.00    | 0.00  | 0.00 | 0.00  | 0.00    | 0.00 |
| Niacin(B3)     | 0.00    | 0.00  | 0.00  | 0.00    | 0.00  | 0.00  | 0.00    | 0.00  | 0.00  | 0.00    | 0.00  | 0.00 | 0.00  | 0.00    | 0.00 |
| Molybdenum     | 0.00    | 0.00  | 0.00  | 0.00    | 0.00  | 0.00  | 0.00    | 0.00  | 0.00  | 0.00    | 0.00  | 0.00 | 0.00  | 0.00    | 0.00 |

Columns sum to 1.00.

**Supplementary Table S4.** Examples of NRF-ai scores for common foods in the Australian food system.

| DRIED FRUITS                                                                                                    | SERVING | NRF-ai score |
|-----------------------------------------------------------------------------------------------------------------|---------|--------------|
| Apricot, dried                                                                                                  | 30 g    | 0.037        |
| Date, dried                                                                                                     | 30 g    | 0.024        |
| Mixed dried fruit                                                                                               | 30 g    | 0.012        |
| Prune (dried plum)                                                                                              | 30 g    | 0.023        |
| Sultana                                                                                                         | 30 g    | 0.022        |
| FRESH FRUITS                                                                                                    | SERVING | NRF-ai score |
| Apple, red skin, unpeeled, raw                                                                                  | 150 g   | 0.020        |
| Apricot, raw                                                                                                    | 150 g   | 0.050        |
| Banana, cavendish, peeled, raw                                                                                  | 150 g   | 0.067        |
| Blueberry, raw                                                                                                  | 150 g   | 0.016        |
| Grape, red globe, raw                                                                                           | 150 g   | 0.024        |
| Grapefruit, peeled, raw                                                                                         | 150 g   | 0.037        |
| Kiwifruit, gold, peeled, raw                                                                                    | 150 g   | 0.082        |
| Mandarin, peeled, raw                                                                                           | 150 g   | 0.058        |
| Mango, peeled, raw                                                                                              | 150 g   | 0.058        |
| Melon, watermelon, peeled, raw                                                                                  | 150 g   | 0.022        |
| NUTS                                                                                                            | SERVING | NRF-ai score |
| Nut, almond, with skin, roasted, unsalted                                                                       | 30 g    | 0.083        |
| Nut, brazil, raw or blanched, unsalted                                                                          | 30 g    | 0.180        |
| Nut, cashew, raw, unsalted                                                                                      | 30 g    | 0.090        |
| Nut, hazelnut, raw, unsalted                                                                                    | 30 g    | 0.069        |
| Nut, macadamia, raw, unsalted                                                                                   | 30 g    | 0.039        |
| Nut, peanut, with skin, raw, unsalted                                                                           | 30 g    | 0.081        |
| Nut, pecan, raw, unsalted                                                                                       | 30 g    | 0.053        |
| Nut, pine, raw, unsalted                                                                                        | 30 g    | 0.069        |
| Nut, pistachio, raw, unsalted                                                                                   | 30 g    | 0.095        |
| Nut, walnut, raw, unsalted                                                                                      | 30 g    | 0.062        |
| VEGETABLES                                                                                                      | SERVING | NRF-ai score |
| Asparagus, green, boiled, drained                                                                               | 75 g    | 0.039        |
| Avocado, raw                                                                                                    | 75 g    | 0.033        |
| Bean, green, fresh, boiled, drained                                                                             | 75 g    | 0.030        |
| Beetroot, canned in brine, drained                                                                              | 75 g    | 0.020        |
| Bok choy, steamed                                                                                               | 75 g    | 0.078        |
| Broccoli, fresh, boiled, drained                                                                                | 75 g    | 0.045        |
| Carrot, mature, peeled, fresh, boiled, drained                                                                  | 75 g    | 0.138        |
| Celery, fresh, raw                                                                                              | 75 g    | 0.021        |
| Cucumber, common, unpeeled, raw                                                                                 | 75 g    | 0.024        |
| Kale, raw                                                                                                       | 75 g    | 0.188        |
| MUSHROOMS                                                                                                       | SERVING | NRF-ai score |
| Mushroom, common, fresh, raw                                                                                    | 75 g    | 0.016        |
| Mushroom, common, fresh, fried, no added fat                                                                    | 75 g    | 0.027        |
| GRAIN (CEREAL) FOODS                                                                                            | SERVING | NRF-ai score |
| Bread, from white flour                                                                                         | 40 g    | 0.051        |
| Bread, from white flour, added iron                                                                             | 40 g    | 0.070        |
| Bread, from wholemeal flour                                                                                     | 40 g    | 0.061        |
| Bread, mixed grain                                                                                              | 40 g    | 0.063        |
| Bread, from rye flour, sour dough                                                                               | 40 g    | 0.034        |
| Breakfast cereal, flakes of corn, unfortified                                                                   | 30 g    | 0.007        |
| Breakfast cereal, flakes of corn, added vitamins B1, B2, B3, C & folate, Fe & Zn                                | 30 g    | 0.078        |
| Breakfast cereal, mixed grain (wheat, oat & corn), extruded, added vitamins B1, B2, B3, B6, C & folate, Ca & Fe | 30 g    | 0.138        |
| Muesli, toasted, added dried fruit & nuts, unfortified                                                          | 30 g    | 0.051        |
| Muesli, untoasted or natural style, added dried fruit, unfortified                                              | 30 g    | 0.038        |

Table continued on next page

**Supplementary Table S4 continued**

| DAIRY FOODS AND ALTERNATIVES                                                     | SERVING | NRF-ai score |
|----------------------------------------------------------------------------------|---------|--------------|
| Milk, cow, fluid, regular fat (3.5% fat)                                         | 250 ml  | 0.160        |
| Milk, cow, fluid, reduced fat (1% fat)                                           | 250 ml  | 0.157        |
| Oat beverage, fluid, unfortified                                                 | 250 ml  | 0.034        |
| Oat beverage, fluid, added calcium                                               | 250 ml  | 0.093        |
| Rice beverage, fluid, added calcium                                              | 250 ml  | 0.067        |
| Soy beverage, regular fat (3% fat), unfortified                                  | 250 ml  | 0.056        |
| Soy beverage, regular fat (3% fat), added Ca                                     | 250 ml  | 0.120        |
| Beverage, chocolate flavour, from drinking chocolate, with regular fat cows milk | 250 ml  | 0.130        |
| Yoghurt, natural, regular fat (3% fat)                                           | 200 g   | 0.168        |
| Yoghurt, apricot pieces or flavoured, regular fat (3% fat)                       | 200 g   | 0.096        |
| Yoghurt, strawberry pieces or flavoured, regular fat (3% fat)                    | 200 g   | 0.116        |
| Yoghurt, vanilla flavoured, (2% fat)                                             | 200 g   | 0.121        |
| Yoghurt, vanilla flavoured, low fat (less than 0.5% fat)                         | 200 g   | 0.125        |
| Yoghurt, soy based, berry flavoured, regular fat (3% fat)                        | 200 g   | 0.050        |
| Yoghurt, soy based, vanilla flavoured, reduced fat (1% fat)                      | 200 g   | 0.048        |
| Cheese, camembert                                                                | 40 g    | 0.105        |
| Cheese, cheddar, natural, regular fat                                            | 40 g    | 0.124        |
| Cheese, cheddar, processed, regular fat                                          | 40 g    | 0.103        |
| Cheese, goat, firm                                                               | 40 g    | 0.069        |
| Cheese, soy                                                                      | 40 g    | 0.033        |
| SPREADS                                                                          | SERVING | NRF-ai score |
| Peanut butter, smooth & crunchy, added sugar & salt                              | 10 g    | 0.018        |
| Peanut butter, smooth & crunchy, no added sugar or salt                          | 10 g    | 0.019        |
| Butter, plain, salted                                                            | 10 g    | 0.009        |
| Margarine spread, polyunsaturated (70% fat)                                      | 10 g    | 0.007        |
| Oil, olive                                                                       | 8 g     | 0.000        |
| PROTEIN-RICH FOODS                                                               | SERVING | NRF-ai score |
| Tofu (soy bean curd), firm, as purchased                                         | 170 g   | 0.306        |
| Egg, chicken, whole, hard-boiled                                                 | 120 g   | 0.116        |
| Egg, chicken, whole, poached                                                     | 120 g   | 0.136        |
| Egg, chicken, whole, fried, no fat added                                         | 120 g   | 0.151        |
| Chickpea, canned, drained                                                        | 150 g   | 0.105        |
| Salmon, Atlantic, fillet, grilled, no added fat                                  | 100 g   | 0.134        |
| Salmon, Atlantic, fillet, steamed, no added fat                                  | 100 g   | 0.133        |
| Barramundi, aquacultured, fillet, grilled, no added fat                          | 100 g   | 0.136        |
| Barramundi, aquacultured, fillet, steamed with no added fat                      | 100 g   | 0.111        |
| Oyster, aquacultured, raw                                                        | 100 g   | 0.445        |
| DISCRETIONARY FOODS                                                              | SERVING | NRF-ai score |
| Soft drink, cola flavour                                                         | 375 g   | -0.135       |
| Biscuit, sweet, Anzac style, homemade from basic ingredients                     | 35 g    | -0.020       |
| Biscuit, sweet, biscuit base, mint filling, chocolate-coated                     | 35 g    | -0.006       |
| Doughnut, jam filled, sugar coated                                               | 40 g    | 0.000        |
| Muffin, cake-style, berry, commercial                                            | 40 g    | 0.004        |
| Ice cream, vanilla flavour, regular fat                                          | 75 g    | 0.024        |
| Ice confection, stick, milk-based, various flavours                              | 75 g    | 0.015        |
| Ice confection, stick, water-based, various flavours                             | 75 g    | -0.035       |
| Ice confection, stick or tub, fruit juice or fruit flavoured                     | 75 g    | -0.034       |
| Corn chips, plain, toasted, salted                                               | 30 g    | 0.032        |
| Potato crisps or chips, plain, salted                                            | 30 g    | 0.023        |
| Chocolate, milk                                                                  | 25 g    | 0.007        |
| Chocolate, white                                                                 | 25 g    | -0.003       |
| Jam, berry                                                                       | 30 g    | -0.052       |
| Lolly, jelly varieties                                                           | 40 g    | -0.052       |
| Lolly, mint flavoured, sugar sweetened                                           | 40 g    | -0.084       |
| Liquorice, allsorts                                                              | 40 g    | -0.048       |

Nutrient composition data sourced from Australian Food Composition Database:  
<https://www.foodstandards.gov.au/science/monitoringnutrients/afcd/pages/default.aspx>
